# Supplementary material for: Introducción a la historia de las ideas políticas contemporáneas: desde la Revolución Francesa a la Revolución Rusa
Source: Royal Society of Chemistry journal article supplement (doi:10.1039/d4cp00829d), 2008-01-01
Supplement: d4cp00829d1.zip [file d4cp00829d1.zip]

**Table 1** Comparisons of the spectroscopic constants for CN.

| State                  | $R_e$ (Å) | $\omega_e(\text{cm}^{-1})$ | $\omega_e x_e(\text{cm}^{-1})$ | $B_e(\text{cm}^{-1})$ | $\alpha_e(\text{cm}^{-1})$ |
|------------------------|-----------|----------------------------|--------------------------------|-----------------------|----------------------------|
| A $^2\Pi$ <sup>a</sup> | 1.24      | 1781.8313                  | 12.766                         | 1.6914                | 0.01691                    |
| A $^2\Pi$ <sup>b</sup> | 1.24      | 1781.3268                  | 12.7775                        | 1.6911                | 0.01673                    |
| D $^2\Pi$ <sup>a</sup> | 1.51      | 986.2968                   | 9.211                          | 1.1452                | 0.01737                    |
| D $^2\Pi$ <sup>b</sup> | 1.51      | 986.10298                  | 9.20309                        | 1.14482               | 0.01734                    |
| H $^2\Pi$ <sup>a</sup> | 1.325     | 2070.8921                  | 119.917                        | 1.4715                | 0.05594                    |
| H $^2\Pi$ <sup>b</sup> | 1.325     | 2070.1574                  | 119.853                        | 1.47126               | 0.05592                    |
| 4 $^2\Pi$ <sup>a</sup> | 1.475     | 1368.7963                  | 23.273                         | 1.2349                | 0.00057                    |
| 4 $^2\Pi$ <sup>b</sup> | 1.475     | 1368.9268                  | 23.34271                       | 1.20318               | 0.00058                    |

Notes: <sup>a</sup> spectroscopic constants fitted based on those data calculated using d-aug-cc-pVTZ basis set.

<sup>b</sup> spectroscopic constants fitted based on those data calculated using aug-cc-pVTZ basis set.

Table 2 PECs of the A  $^2\Pi$ , D  $^2\Pi$ , H  $^2\Pi$ , 4  $^2\Pi$  states of CN calculated using aug-cc-pVTZ basis set.

| $R$  | A $^2\Pi$    | D $^2\Pi$    | H $^2\Pi$    | 4 $^2\Pi$    |
|------|--------------|--------------|--------------|--------------|
| 0.8  | 189583.68778 | 236260.52524 | 238033.47643 | 250447.53221 |
| 0.85 | 132253.2686  | 185087.56999 | 189236.97054 | 200106.40996 |
| 0.9  | 90709.39847  | 146538.23149 | 154640.75423 | 163887.69671 |
| 0.95 | 61069.65677  | 117684.30334 | 129595.36936 | 138272.6786  |
| 0.98 | 47734.34305  | 104285.69972 | 118648.31493 | 127083.11787 |
| 1    | 40355.82322  | 96740.55256  | 112753.96157 | 121192.4056  |
| 1.02 | 34035.70664  | 90171.97094  | 107824.84886 | 116450.86908 |
| 1.04 | 28660.55563  | 84479.49254  | 103732.6017  | 112742.16481 |
| 1.06 | 24195.20818  | 79551.90079  | 100346.64146 | 105261.84387 |
| 1.08 | 20409.65926  | 75350.37502  | 97585.99298  | 100148.15519 |
| 1.1  | 17291.27152  | 71782.99705  | 92618.49635  | 97923.35183  |
| 1.12 | 14766.3761   | 68781.71877  | 86914.75891  | 96091.0525   |
| 1.14 | 12768.31418  | 66285.64916  | 82076.66672  | 94810.5146   |
| 1.16 | 11247.01699  | 64224.54533  | 77801.88909  | 91541.11295  |
| 1.18 | 10133.8263   | 62679.59317  | 74091.79116  | 88308.54572  |
| 1.2  | 9376.98778   | 61391.65239  | 70776.79804  | 85291.80327  |
| 1.22 | 8941.47988   | 60412.11955  | 67877.50305  | 82572.51917  |
| 1.24 | 8788.31073   | 59699.14524  | 65358.04402  | 80157.10648  |
| 1.26 | 8882.4017    | 59207.7569   | 63193.2099   | 78031.70756  |
| 1.28 | 9192.30208   | 58869.58161  | 61387.14218  | 76177.93923  |
| 1.3  | 9689.794     | 58498.72435  | 60068.08868  | 74575.44521  |
| 1.32 | 10349.52596  | 57707.66096  | 59567.73261  | 73204.1743   |
| 1.34 | 11148.77137  | 56695.50761  | 59639.30767  | 72045.29557  |
| 1.36 | 12067.11687  | 55773.13475  | 59926.94674  | 71081.84583  |
| 1.38 | 13086.28683  | 54996.00141  | 60335.3166   | 70298.62427  |
| 1.4  | 14189.89745  | 54362.52081  | 60825.94555  | 69683.05719  |
| 1.42 | 15363.29443  | 53863.03606  | 61220.55655  | 69225.04875  |
| 1.44 | 16593.3817   | 53485.49579  | 61851.08741  | 68917.15876  |
| 1.46 | 17868.4503   | 53217.96939  | 62489.10017  | 68754.91434  |
| 1.48 | 19178.0664   | 53049.12097  | 63113.69205  | 68735.38329  |
| 1.5  | 20512.94403  | 52968.6067   | 63681.34782  | 68855.93851  |
| 1.55 | 23908.72795  | 53094.07157  | 64888.23881  | 69716.71143  |
| 1.6  | 27307.83911  | 53590.3081   | 65880.1171   | 71144.15688  |
| 1.65 | 30632.83368  | 54362.16307  | 66813.55368  | 72789.86765  |
| 1.68 | 32568.17854  | 54926.76814  | 67388.32921  | 73774.69641  |
| 1.73 | 35664.56834  | 55997.15031  | 68391.51263  | 75302.41103  |
| 1.75 | 36851.73296  | 56461.97343  | 68808.43103  | 75853.91566  |
| 1.8  | 39677.03867  | 57694.57808  | 69881.84853  | 77052.12863  |
| 1.85 | 42284.34022  | 59004.39829  | 70983.94039  | 77996.42043  |
| 1.9  | 44661.96158  | 60366.59612  | 72093.65242  | 78740.45918  |
| 1.95 | 46804.85262  | 61760.38294  | 73190.09719  | 79362.24398  |
| 2    | 48714.07341  | 63166.91684  | 74252.87895  | 79917.92961  |

|      |             |             |             |             |
|------|-------------|-------------|-------------|-------------|
| 2.05 | 50396.37499 | 64568.15262 | 75261.71824 | 80439.02603 |
| 2.1  | 51863.48389 | 65946.5806  | 76195.96468 | 80940.06467 |
| 2.15 | 53131.02671 | 67285.61069 | 77034.86915 | 81432.25408 |
| 2.2  | 54217.32956 | 68570.323   | 77759.04984 | 81927.54249 |
| 2.25 | 55141.60088 | 69788.27991 | 78354.37697 | 82438.24239 |
| 2.3  | 55923.60216 | 70929.65334 | 78818.38804 | 82968.92547 |
| 2.35 | 56587.75874 | 71992.31    | 79172.67058 | 83517.29161 |
| 2.4  | 57142.33601 | 72965.44735 | 79418.78723 | 84060.50669 |
| 2.45 | 57606.87602 | 73851.85491 | 79588.37528 | 84581.03028 |
| 2.5  | 57995.80482 | 74653.5694  | 79694.34641 | 85055.69904 |
| 2.55 | 58321.60613 | 75373.93781 | 79755.75541 | 85450.17177 |
| 2.6  | 58594.94422 | 76016.35103 | 79795.4474  | 85693.30577 |
| 2.7  | 59018.74315 | 77082.85947 | 79839.22381 | 85022.09309 |
| 2.8  | 59321.97589 | 77891.51156 | 79858.30274 | 81918.42112 |
| 2.9  | 59540.20829 | 78502.37749 | 79892.36301 | 80500.26165 |
| 3    | 59703.68178 | 78952.24562 | 79913.25919 | 80271.17403 |
| 3.2  | 59921.42256 | 79529.22028 | 79940.35772 | 80006.15183 |
| 3.3  | 59994.82585 | 79712.82618 | 79953.04774 | 79925.84167 |
| 3.35 | 60025.40305 | 79786.99543 | 79958.81334 | 79895.07132 |
| 3.45 | 60076.87863 | 79908.57121 | 79967.27409 | 79846.69253 |
| 3.5  | 60098.5759  | 79958.86163 | 79968.75774 | 79828.21935 |
| 3.6  | 60135.5859  | 80044.73547 | 79962.57294 | 79799.92688 |
| 3.7  | 60165.32033 | 80118.75987 | 79941.0754  | 79781.0367  |
| 3.8  | 60189.39669 | 80187.93169 | 79926.60325 | 79768.75051 |
| 4    | 60224.80015 | 80297.70632 | 79948.20833 | 79756.91643 |
| 4.1  | 60237.71184 | 80326.80865 | 79963.1765  | 79754.95214 |
| 4.2  | 60248.23784 | 80345.23355 | 79976.34059 | 79754.53733 |
| 4.3  | 60256.85442 | 80358.09257 | 79987.39991 | 79755.14527 |
| 4.4  | 60263.94564 | 80367.85699 | 79996.66613 | 79756.39408 |
| 4.5  | 60269.82317 | 80375.90732 | 80004.20728 | 79758.0182  |
| 4.6  | 60274.73282 | 80382.6408  | 80010.44914 | 79759.84203 |
| 4.7  | 60278.8765  | 80388.26155 | 80015.65069 | 79761.73829 |
| 4.8  | 60282.40126 | 80393.34897 | 80020.02043 | 79763.62577 |
| 4.9  | 60285.42782 | 80398.00403 | 80023.72077 | 79765.4518  |
| 5    | 60288.04835 | 80402.05772 | 80026.87901 | 79767.18785 |

---

Table 3 PECs of the A  $^2\Pi$ , D  $^2\Pi$ , H  $^2\Pi$ , 4  $^2\Pi$  states of CN calculated using d-aug-cc-pVTZ basis set.

| $R$  | A $^2\Pi$    | D $^2\Pi$    | H $^2\Pi$    | 4 $^2\Pi$    |
|------|--------------|--------------|--------------|--------------|
| 0.8  | 189494.37039 | 235688.95843 | 236747.5197  | 245632.3422  |
| 0.85 | 132167.17089 | 185084.60708 | 188000.64799 | 195925.18559 |
| 0.9  | 90619.35022  | 146802.38896 | 152430.17062 | 160366.80566 |
| 0.95 | 60969.76508  | 117760.17133 | 127388.87676 | 135181.95564 |
| 0.98 | 47672.67068  | 104247.735   | 116519.69193 | 123954.3402  |
| 1.02 | 34017.16103  | 90112.85545  | 105798.91805 | 113162.75283 |
| 1.04 | 28650.52345  | 84426.10534  | 101790.81965 | 109475.06325 |
| 1.06 | 24192.70178  | 79502.67263  | 98529.76243  | 105185.45792 |
| 1.08 | 20408.25682  | 75306.74785  | 95950.3561   | 100261.59943 |
| 1.1  | 17290.97523  | 71744.62849  | 92754.28311  | 97848.06764  |
| 1.12 | 14767.24961  | 68749.12899  | 87039.85506  | 95638.59238  |
| 1.14 | 12770.46064  | 66259.32098  | 82041.63418  | 93794.55556  |
| 1.16 | 11252.82209  | 64204.40854  | 77777.58447  | 90641.45132  |
| 1.18 | 10132.7399   | 62560.58086  | 74007.07834  | 90282.36229  |
| 1.2  | 9380.52352   | 61390.13582  | 70770.9666   | 85277.5462   |
| 1.22 | 8946.31271   | 60413.44079  | 67874.14289  | 82561.71663  |
| 1.24 | 8794.33751   | 59702.99263  | 65356.65474  | 80148.51843  |
| 1.26 | 8889.58511   | 59213.24377  | 63194.08341  | 78026.3041   |
| 1.28 | 9200.53676   | 58876.44019  | 61390.31579  | 76174.96974  |
| 1.3  | 9699.01413   | 58505.66194  | 60074.46441  | 74574.68802  |
| 1.32 | 10359.67447  | 57713.93355  | 59577.63969  | 73205.44506  |
| 1.34 | 11159.79777  | 56702.80514  | 59650.82351  | 72048.42967  |
| 1.36 | 12078.98167  | 55782.0103   | 59939.64334  | 71086.61502  |
| 1.38 | 13098.94832  | 55005.84046  | 60348.67602  | 70305.02196  |
| 1.4  | 14203.32711  | 54373.58014  | 60839.96559  | 69691.08777  |
| 1.42 | 15377.45932  | 53875.19056  | 61235.31622  | 69234.44007  |
| 1.44 | 16608.25111  | 53498.72134  | 61866.31017  | 68928.05349  |
| 1.46 | 17883.9891   | 53232.14964  | 62504.48973  | 68767.14127  |
| 1.48 | 19194.25046  | 53064.22082  | 63129.51178  | 68748.96877  |
| 1.5  | 20529.74261  | 52984.5669   | 63696.7681   | 68870.85181  |
| 1.55 | 23926.93776  | 53111.6866   | 64903.68544  | 69734.61837  |
| 1.6  | 27327.33284  | 53609.58675  | 65895.89074  | 71163.87228  |
| 1.65 | 30653.56745  | 54382.68175  | 66829.95722  | 72810.97233  |
| 1.68 | 32589.67389  | 54947.94525  | 67405.1695   | 73796.47487  |
| 1.73 | 35687.43321  | 56019.2097   | 68409.1979   | 75325.19469  |
| 1.75 | 36875.20796  | 56484.45642  | 68826.4894   | 75877.17778  |
| 1.8  | 39702.23874  | 57718.33182  | 69901.01525  | 77076.7888   |
| 1.85 | 42311.5858   | 59029.42279  | 71004.50956  | 78021.99581  |
| 1.9  | 44691.63235  | 60393.11963  | 72116.0103   | 78767.91546  |
| 1.95 | 46837.33267  | 61788.67102  | 73214.68494  | 79391.27609  |
| 2    | 48749.73146  | 63197.25701  | 74280.17721  | 79949.11695  |
| 2.05 | 50435.52707  | 64600.83459  | 75292.2296   | 80472.91072  |

|      |             |             |             |             |
|------|-------------|-------------|-------------|-------------|
| 2.1  | 51906.3846  | 65981.87871 | 76230.2115  | 80976.853   |
| 2.15 | 53177.84723 | 67323.76416 | 77073.30355 | 81471.80341 |
| 2.2  | 54268.16867 | 68611.53156 | 77802.06248 | 81970.03497 |
| 2.25 | 55196.46954 | 69832.6928  | 78402.20488 | 82483.84922 |
| 2.3  | 55982.4477  | 70977.36713 | 78870.93905 | 83017.38547 |
| 2.35 | 56644.98236 | 72039.06907 | 79219.52183 | 83564.98126 |
| 2.4  | 57201.68634 | 73014.36386 | 79468.92841 | 84111.19655 |
| 2.45 | 57668.70861 | 73902.77522 | 79641.89417 | 84635.69483 |
| 2.5  | 58060.00554 | 74706.35744 | 79753.05149 | 85116.39256 |
| 2.55 | 58388.12889 | 75428.62211 | 79816.62012 | 85521.98607 |
| 2.6  | 58663.7144  | 76073.13132 | 79858.35541 | 85790.66033 |
| 2.7  | 59091.77114 | 77144.40235 | 79905.9024  | 85259.79728 |
| 2.75 | 59282.31024 | 77522.86441 | 80281.70442 | 81031.1225  |
| 2.85 | 59544.79312 | 78193.53499 | 80355.89782 | 80724.24209 |
| 2.9  | 59648.3193  | 78460.00792 | 80387.03249 | 80606.35129 |
| 3    | 59814.60426 | 78884.50477 | 80432.07527 | 80426.08142 |
| 3.2  | 60036.4141  | 79430.98124 | 80247.04499 | 80455.21448 |
| 3.3  | 60111.43272 | 79599.86917 | 80159.65458 | 80503.47476 |
| 3.4  | 60170.65137 | 79723.58263 | 80097.02969 | 80545.04984 |
| 3.5  | 60217.93937 | 79815.65882 | 80052.033   | 80580.9515  |
| 3.55 | 60209.24817 | 80088.04439 | 80047.25942 | 79908.50317 |
| 3.6  | 60227.19242 | 80130.07598 | 80042.29491 | 79896.47596 |
| 3.7  | 60257.98032 | 80206.99306 | 80021.26485 | 79878.88288 |
| 3.8  | 60283.15406 | 80279.38457 | 80009.29251 | 79867.90475 |
| 4    | 60321.06172 | 80388.20229 | 80034.97323 | 79858.46076 |
| 4.1  | 60335.23759 | 80416.27748 | 80051.616   | 79857.81112 |
| 4.2  | 60347.04971 | 80434.43462 | 80066.24617 | 79858.68682 |
| 4.3  | 60356.93046 | 80447.38582 | 80078.69697 | 79860.52163 |

---
